# Supplementary material for: Investigating the Influence of Heavy Metals and Environmental Factors on Metabolic Syndrome Risk Based on Nutrient Intake: Machine Learning Analysis of Data from the Eighth Korea National Health and Nutrition Examination Survey (KNHANES)
Source: MDPI journal article supplement (doi:10.3390/nu16050724), 2024-03-02

Supplementary  
Figure S1

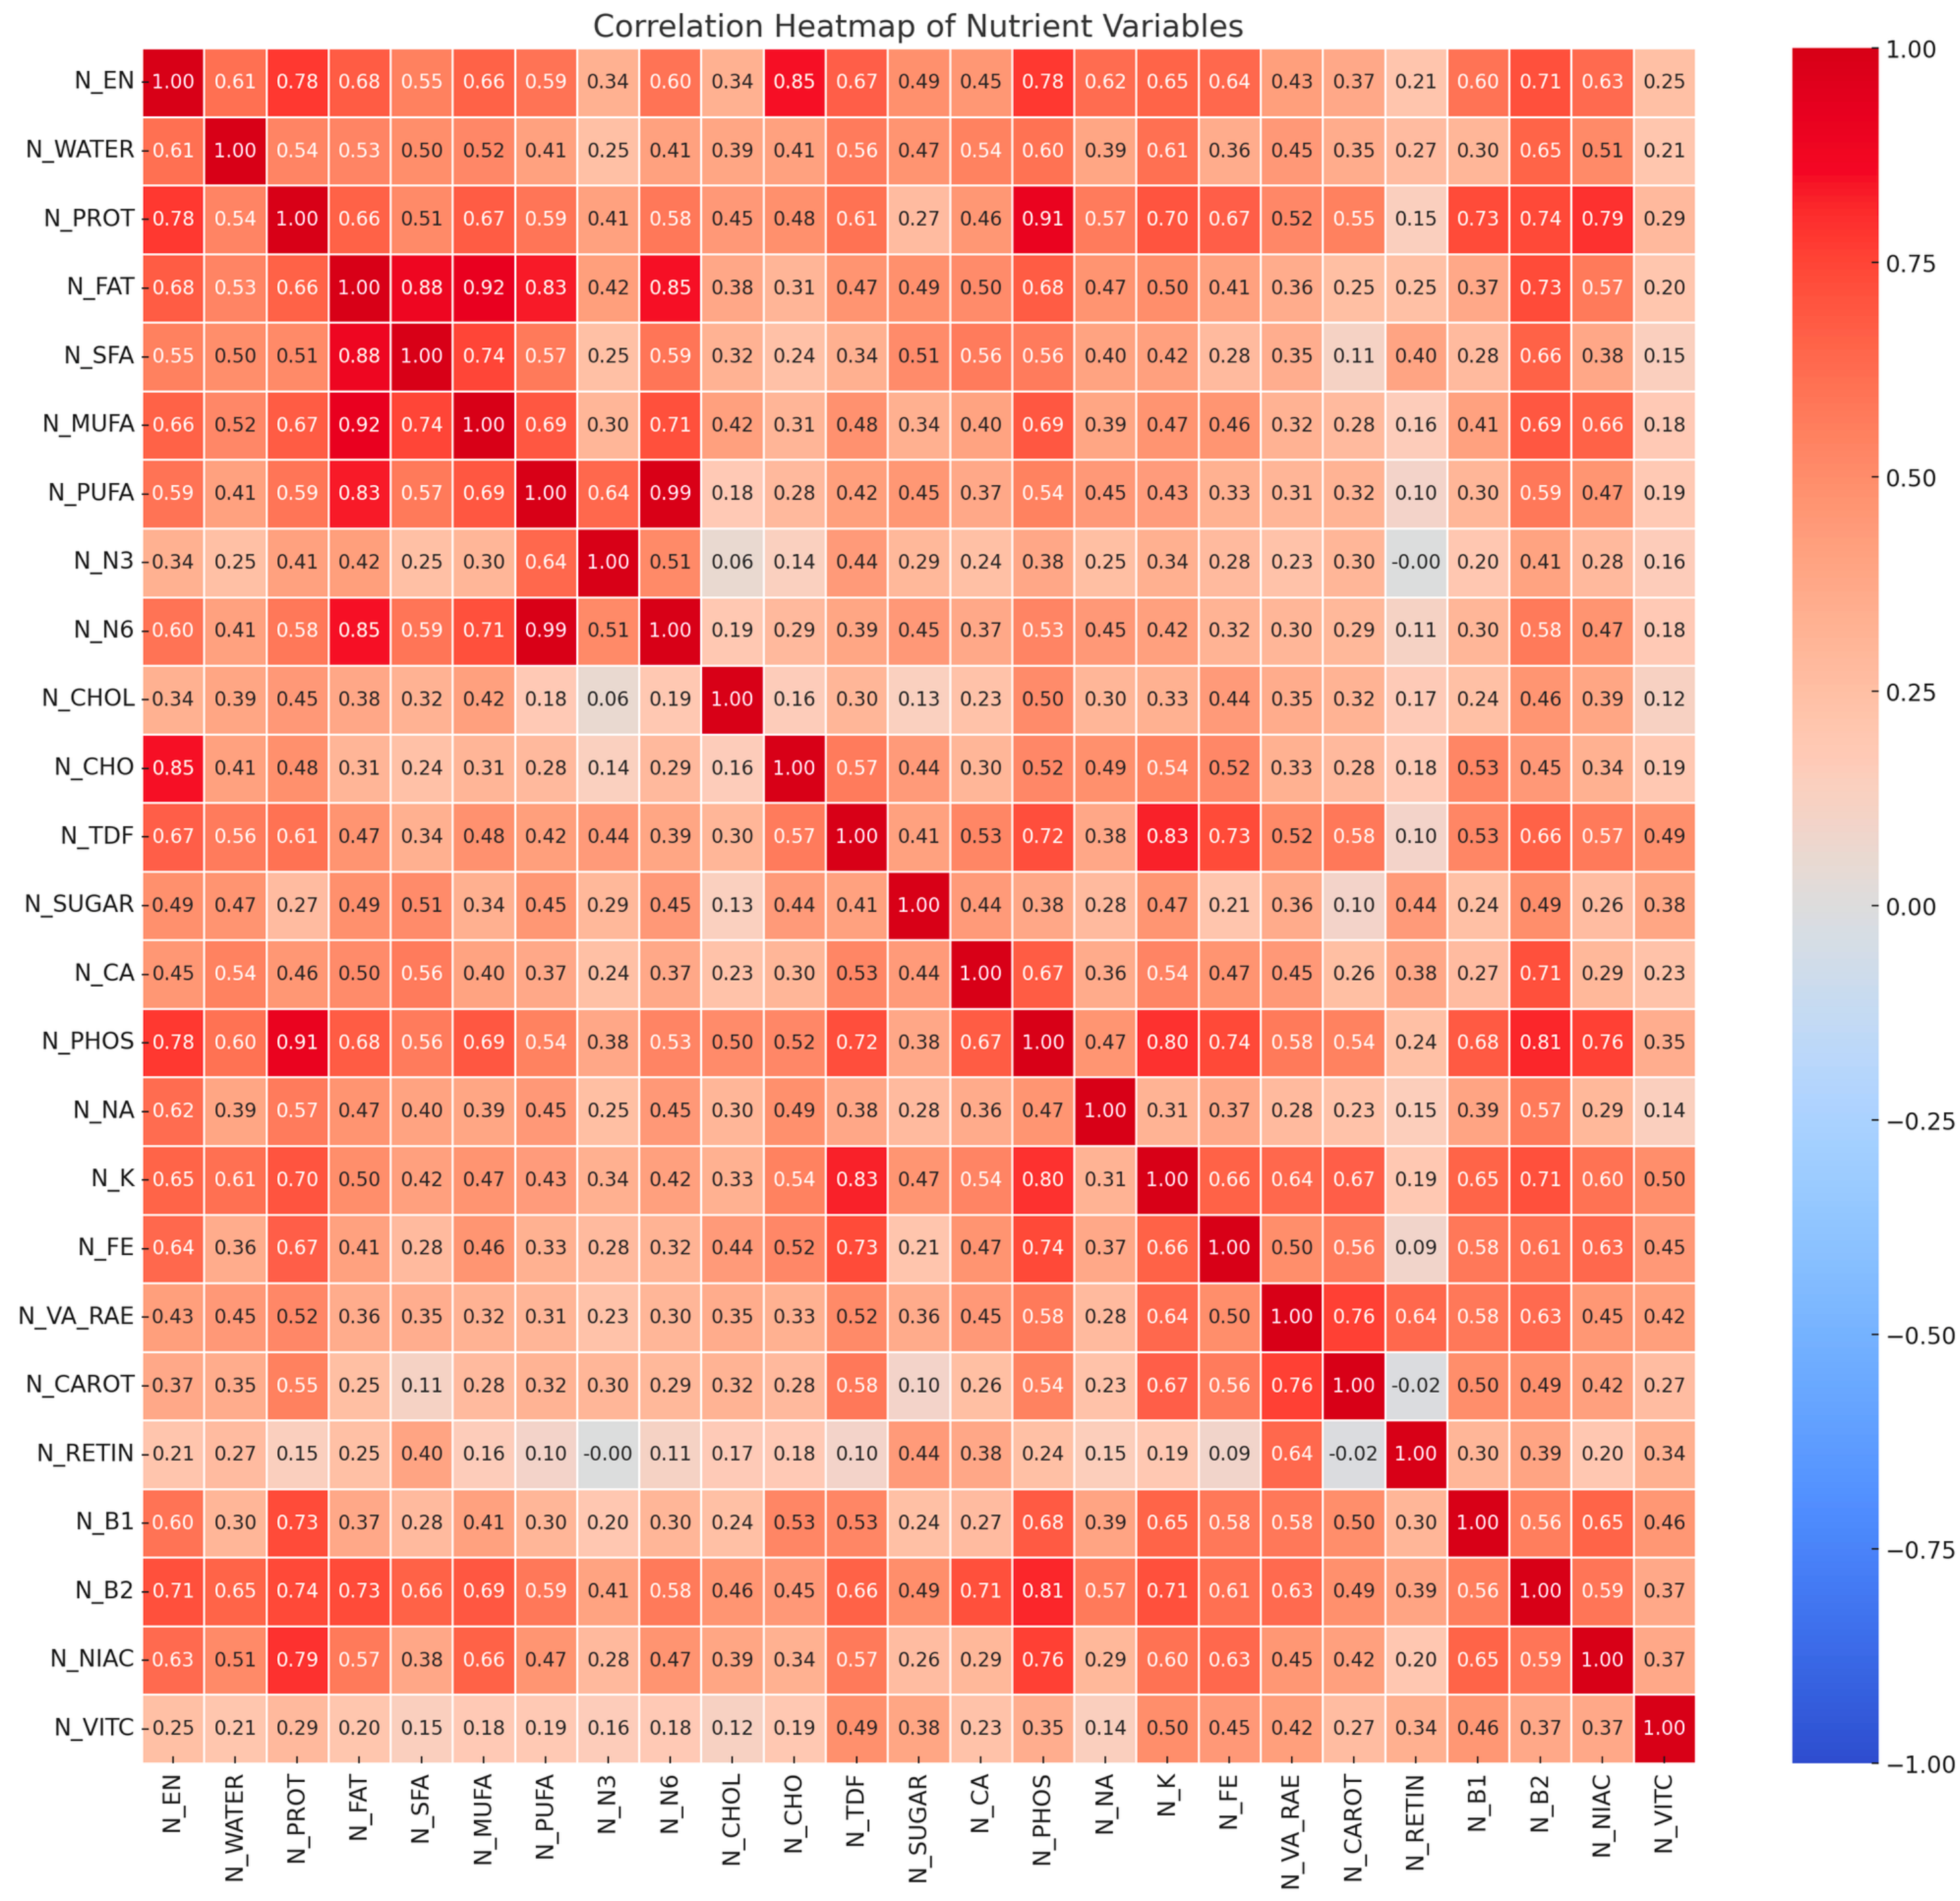

Supplementary  
Figure S2

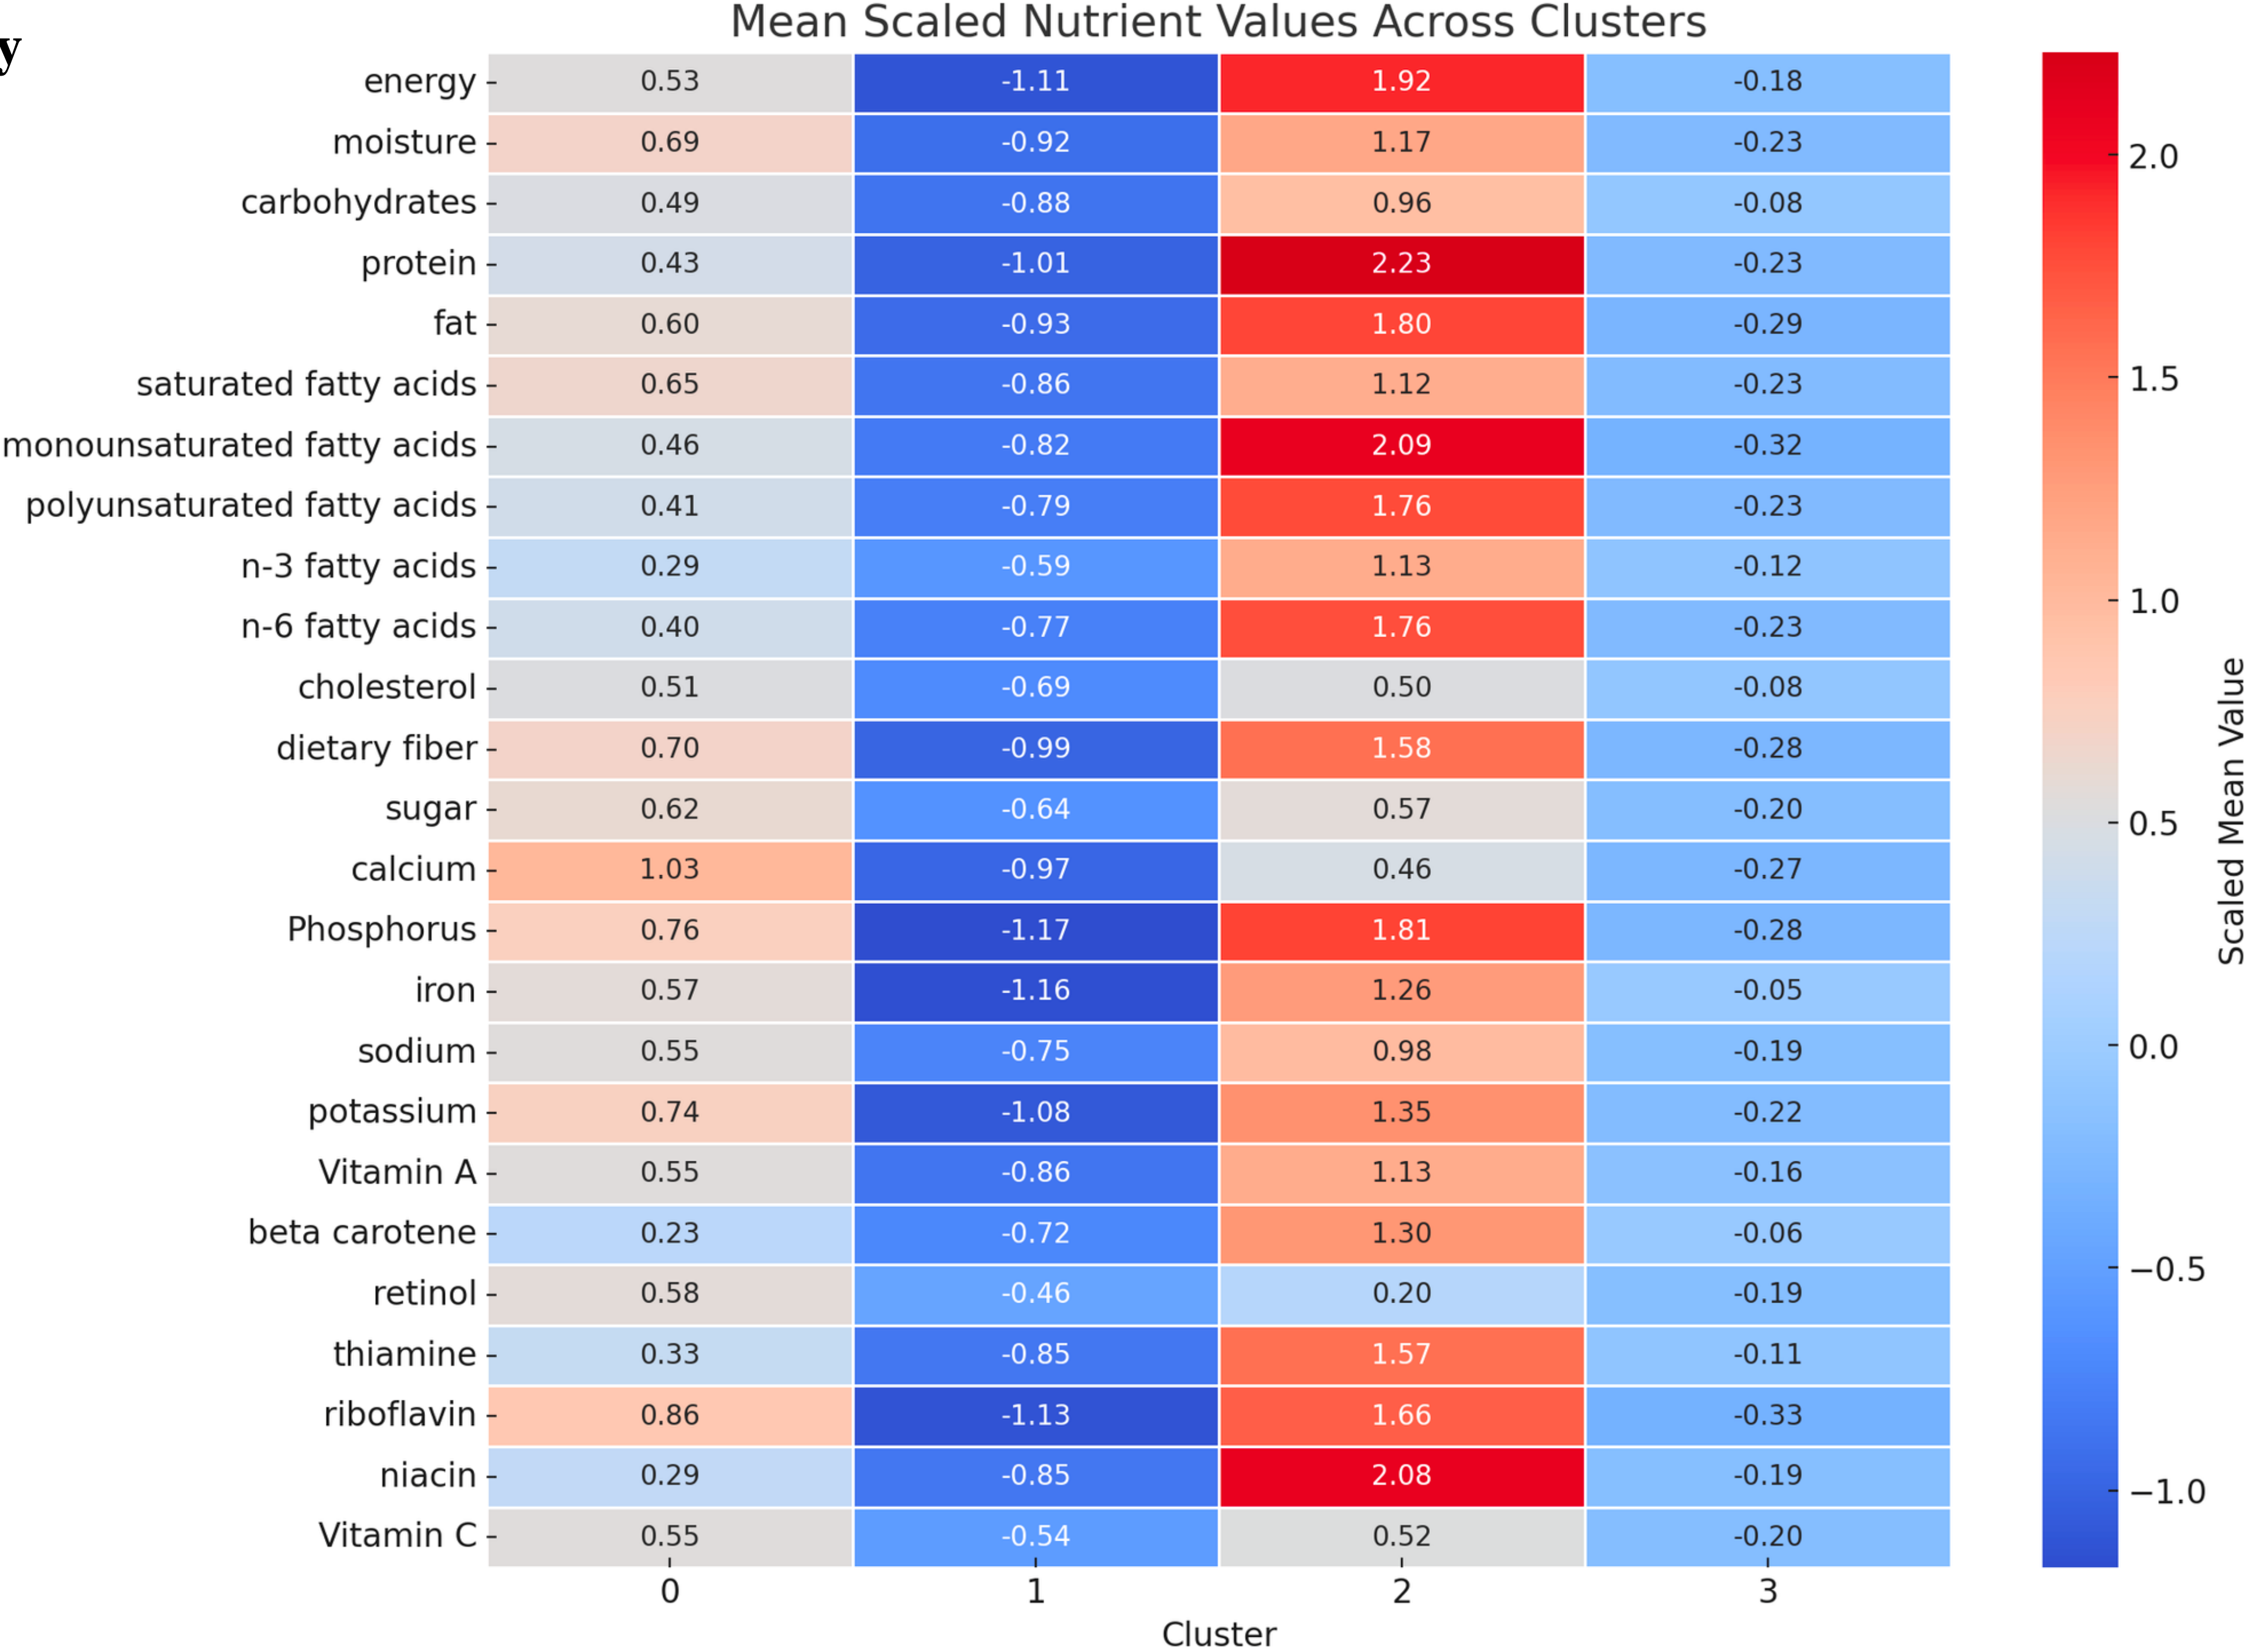



# Supplementary Figure S3

## Cluster 1

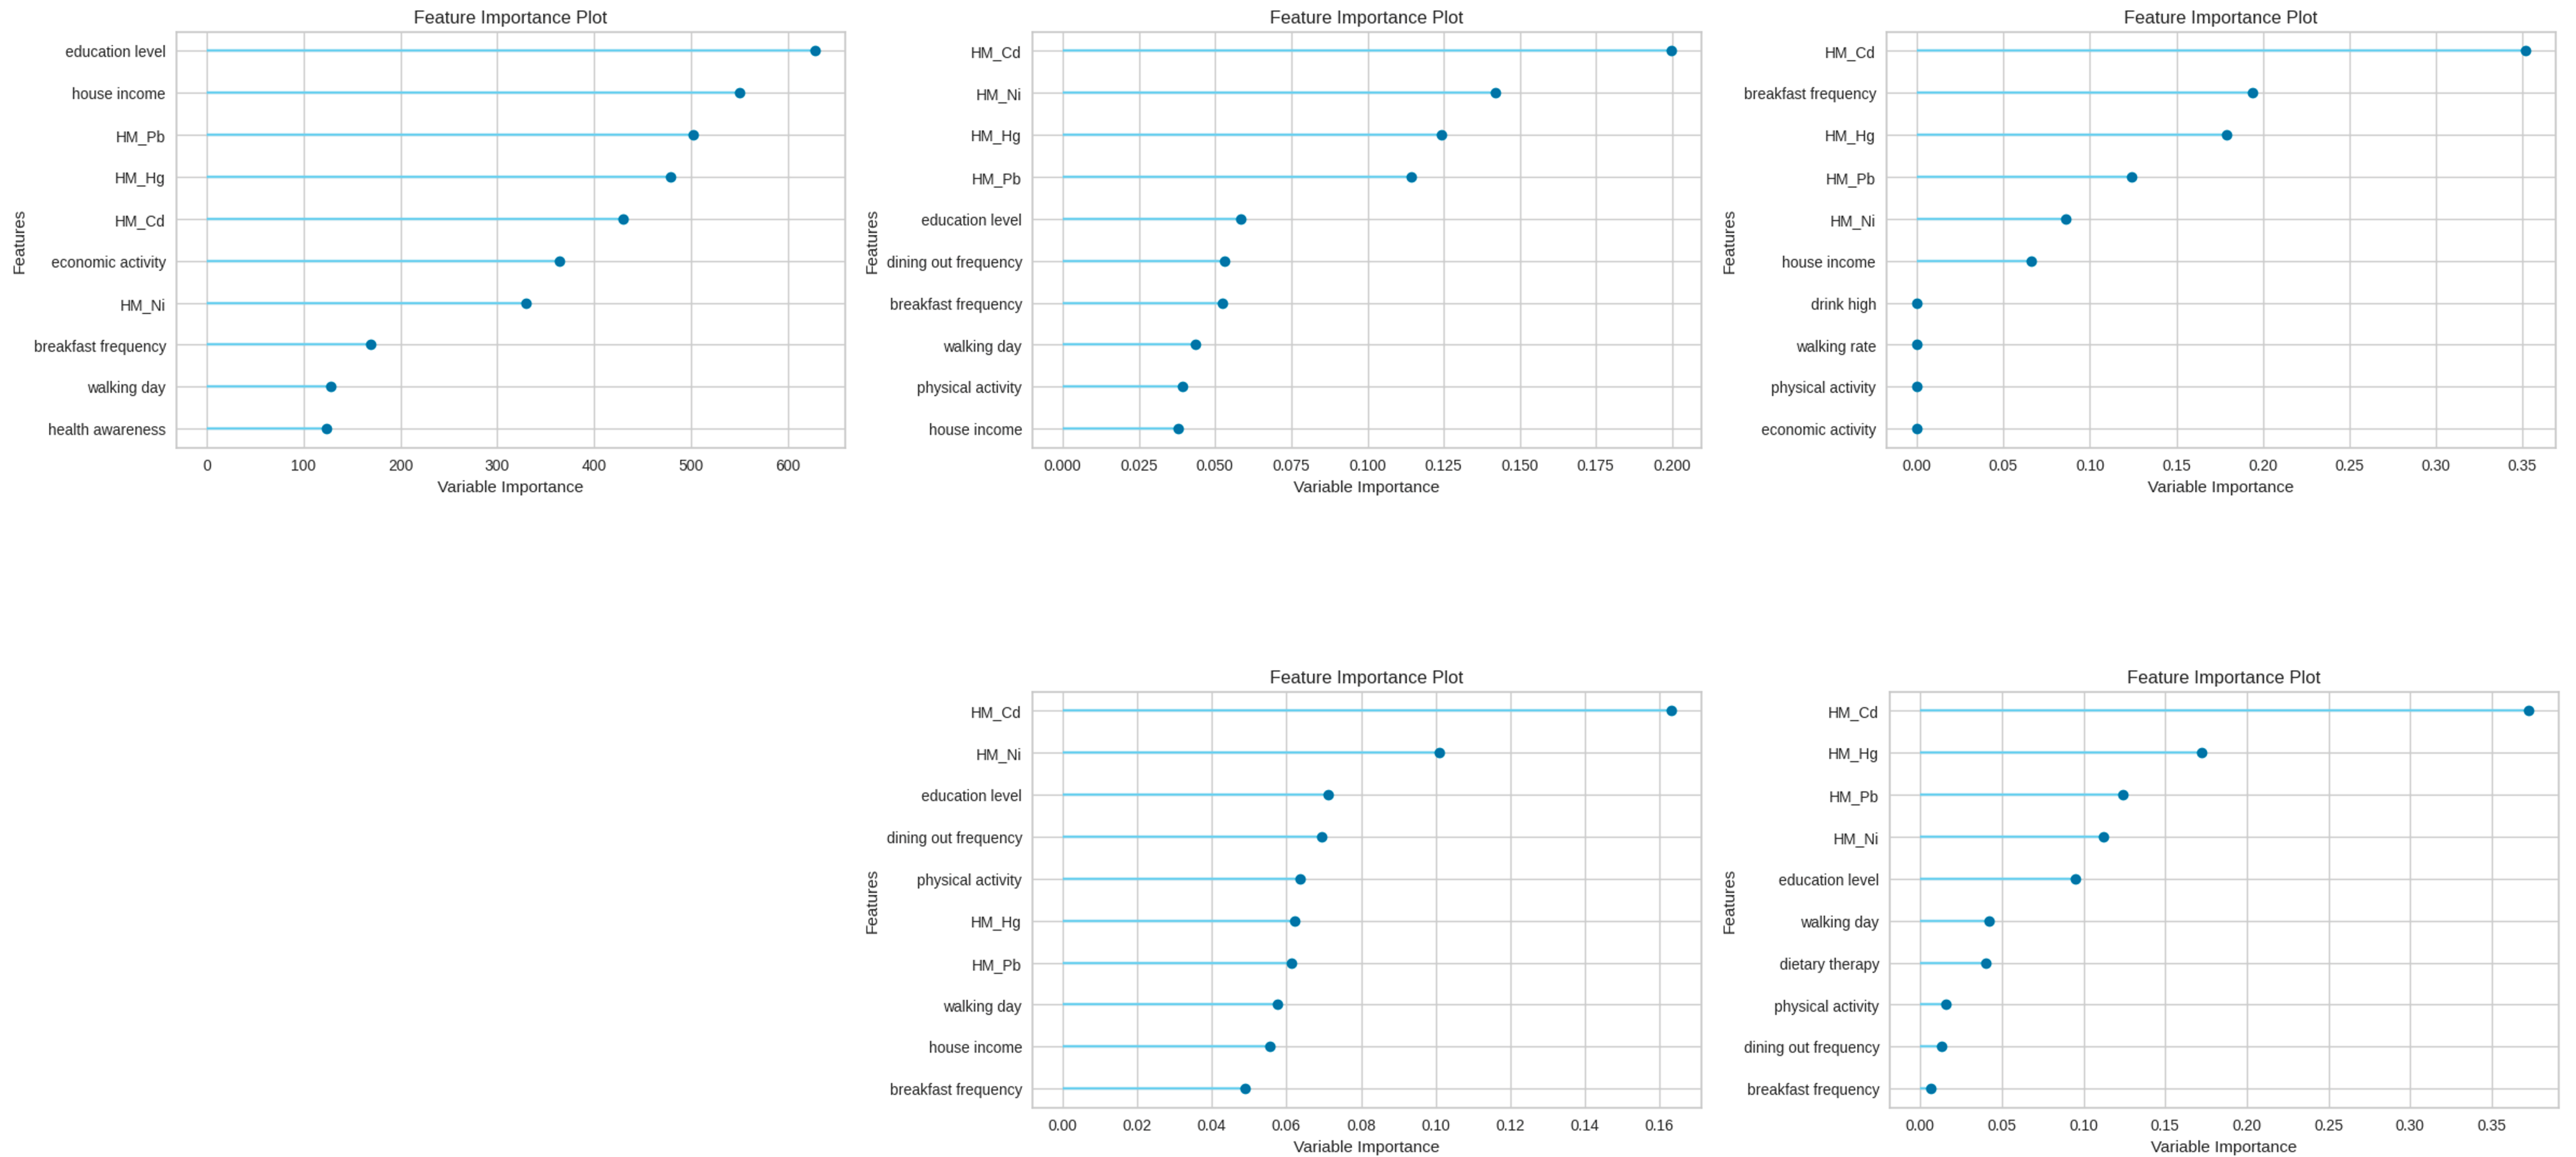

# Supplementary Figure S3

## Cluster 2

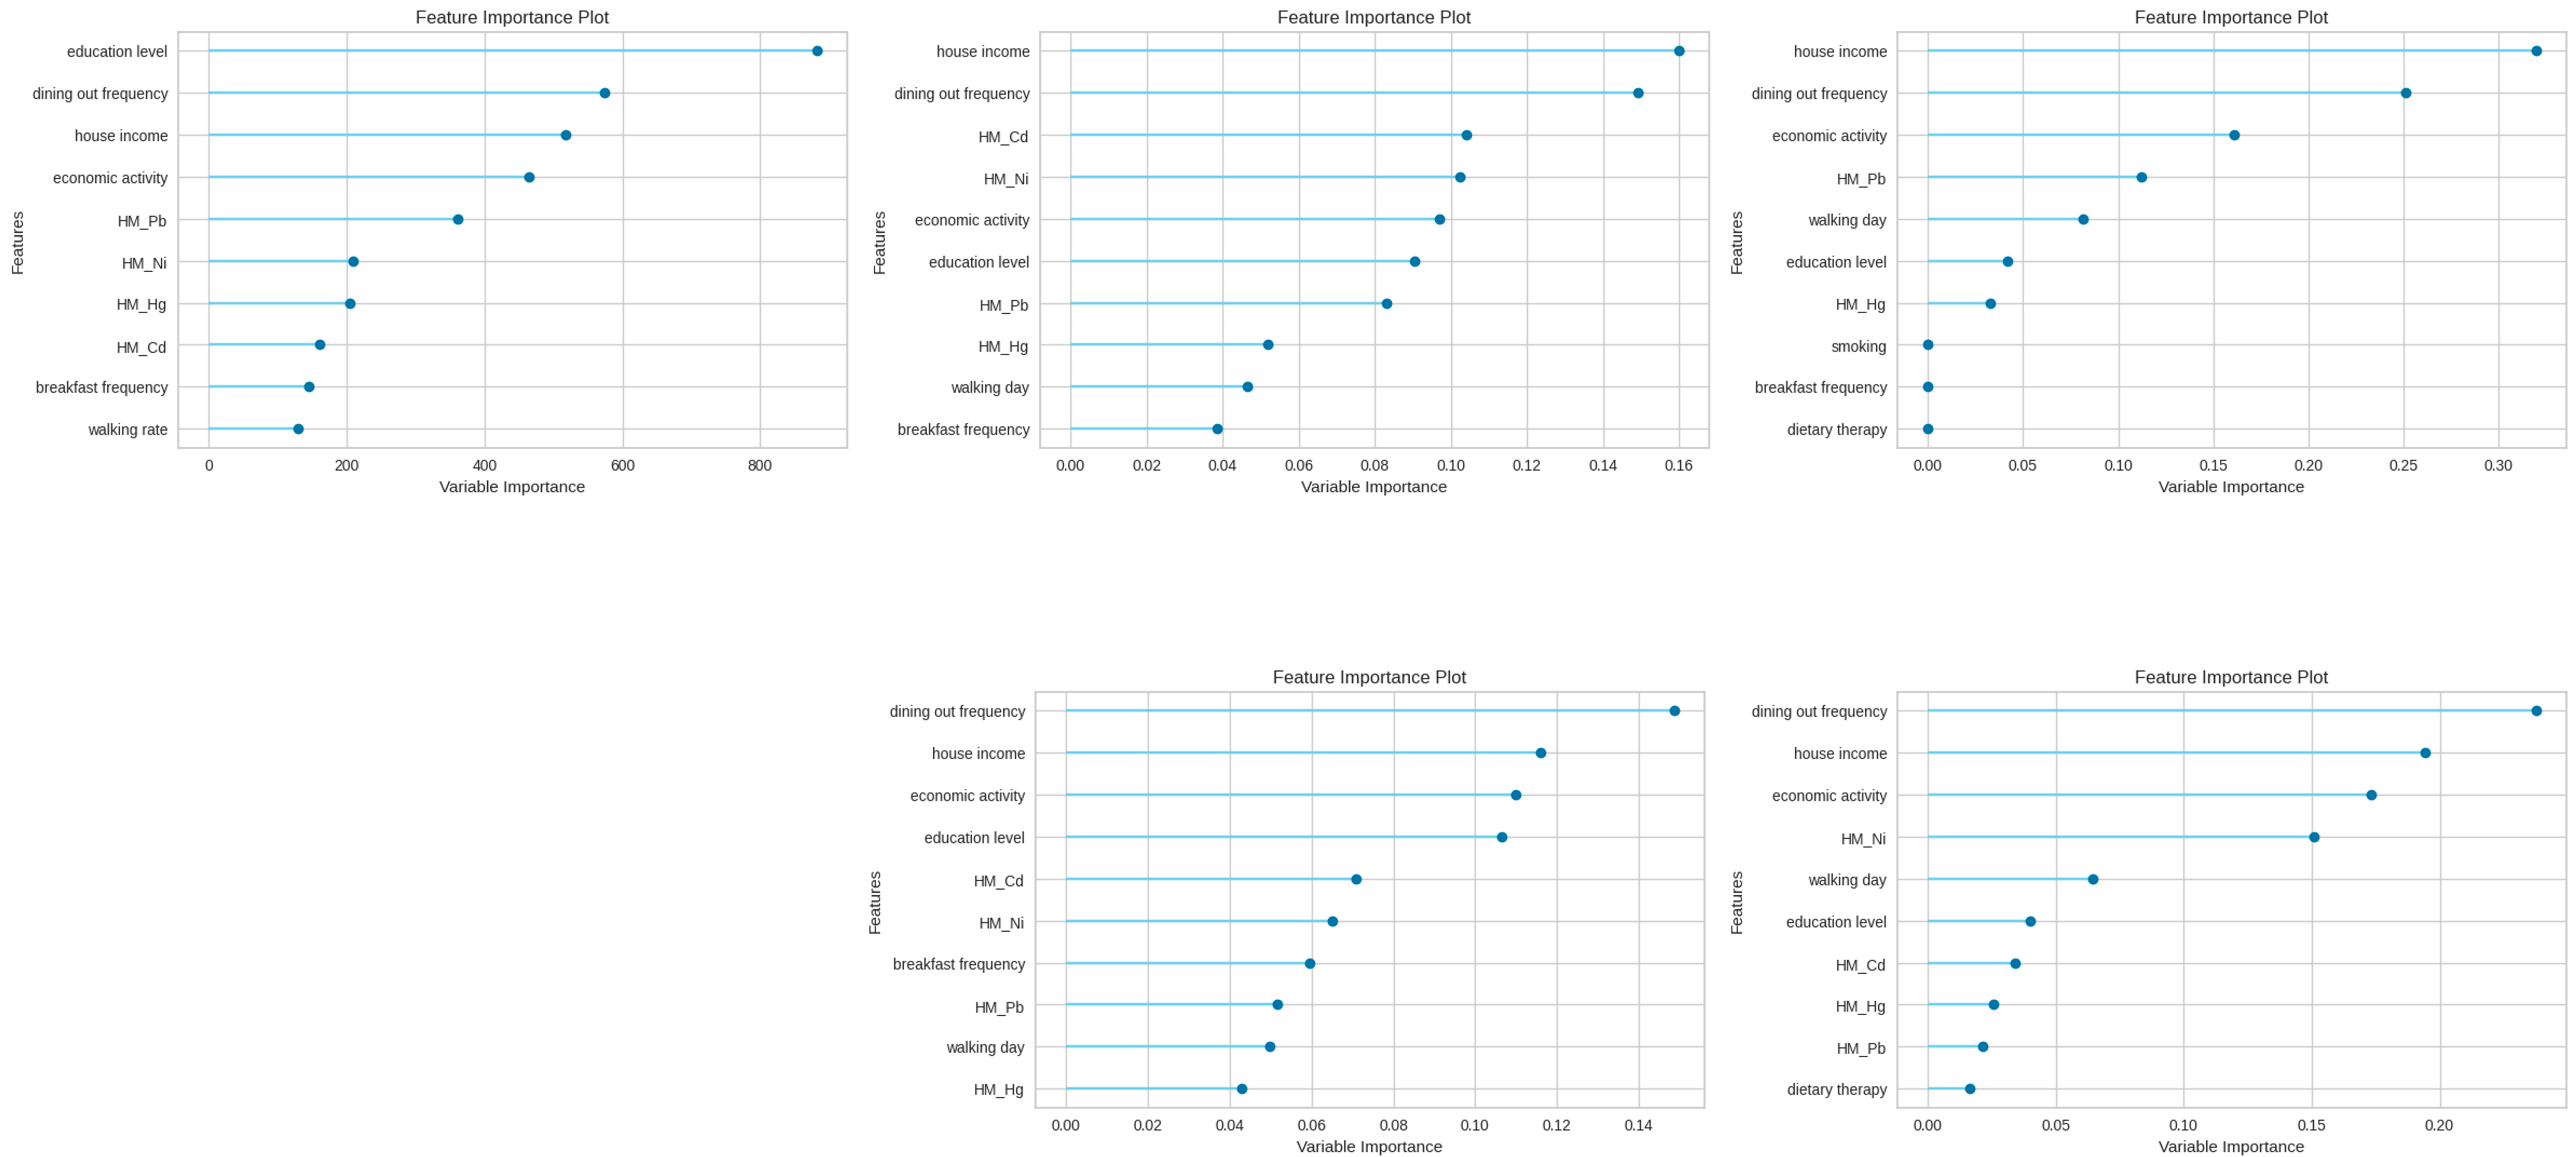

# Supplementary Figure S3

## Cluster 3

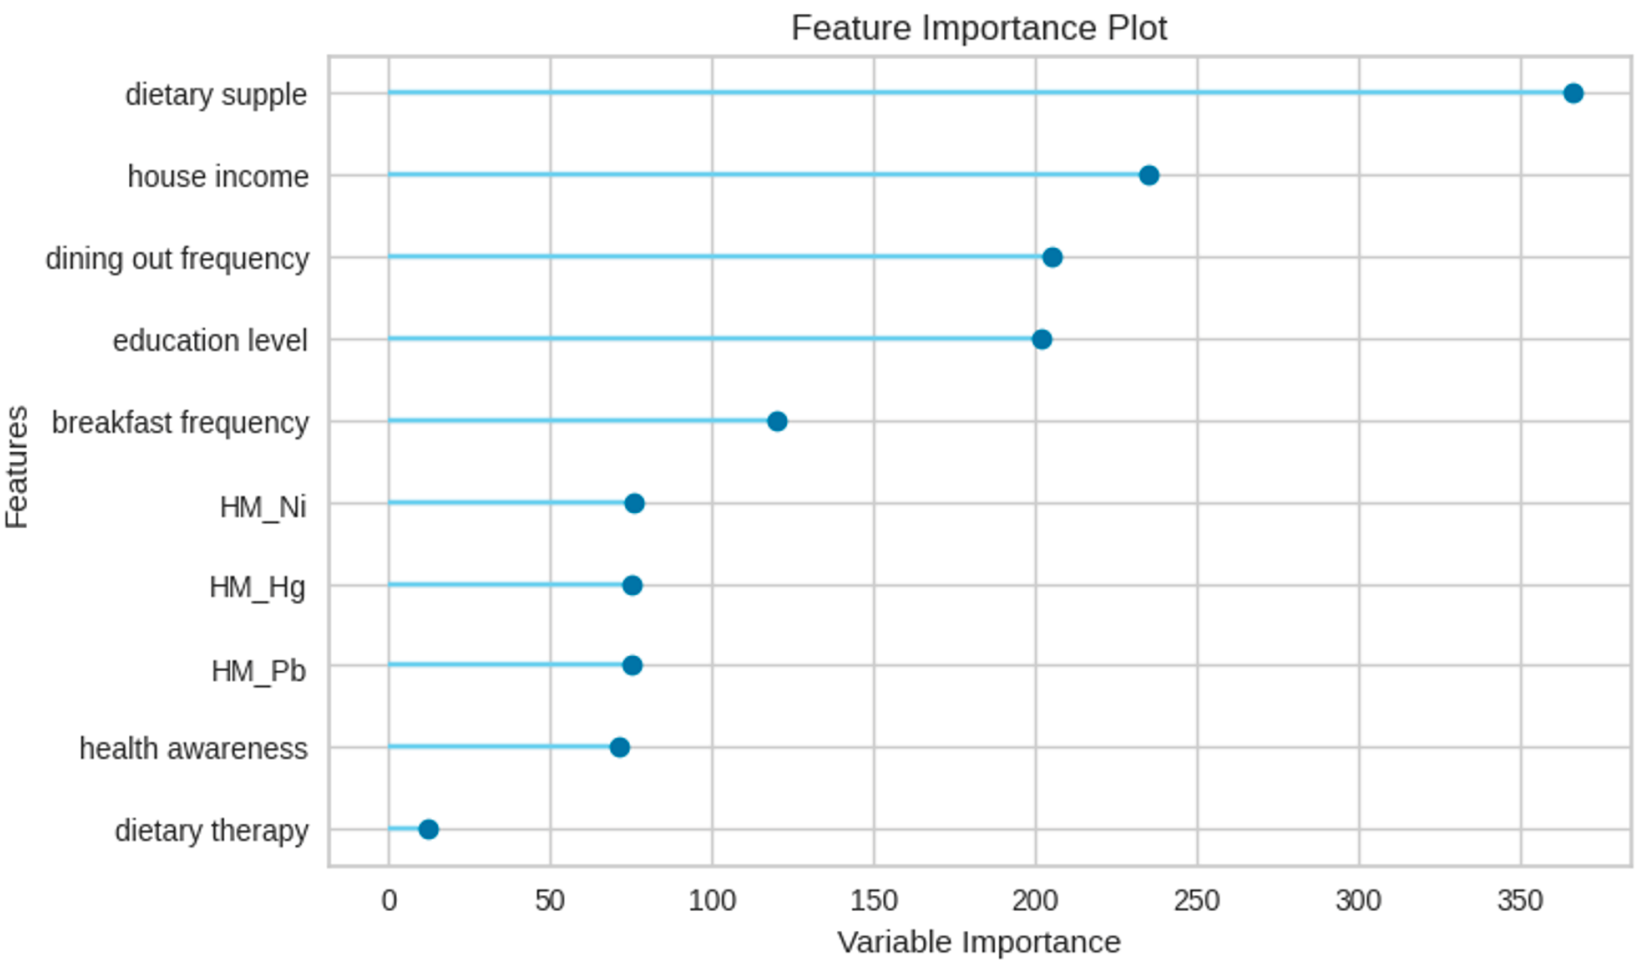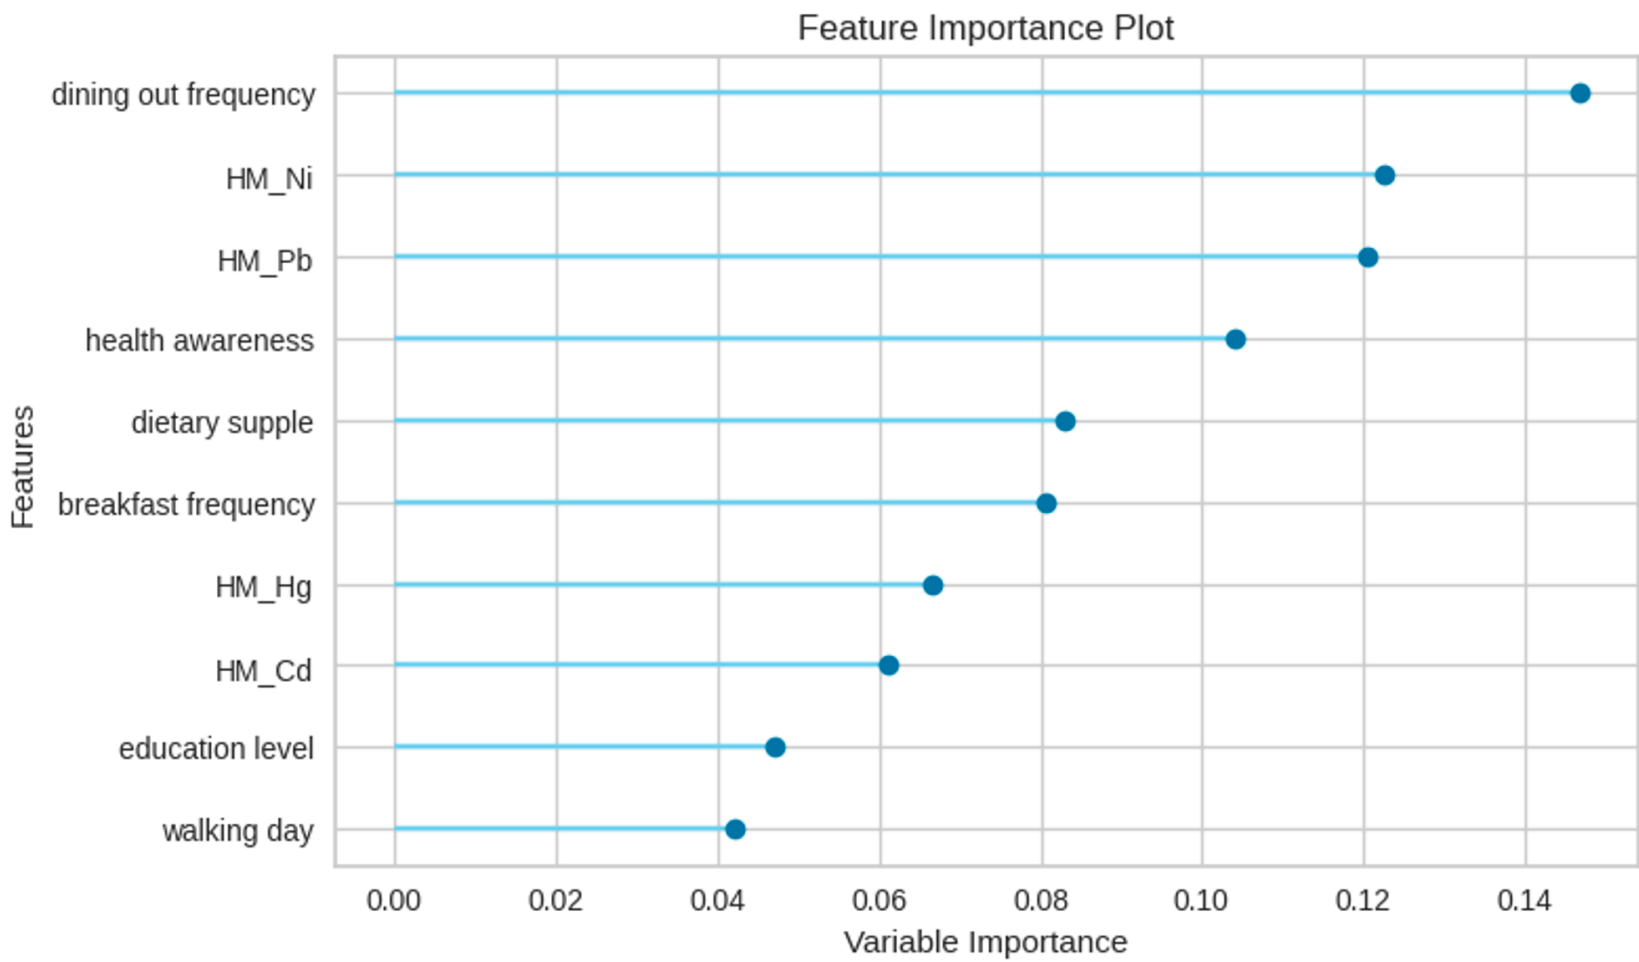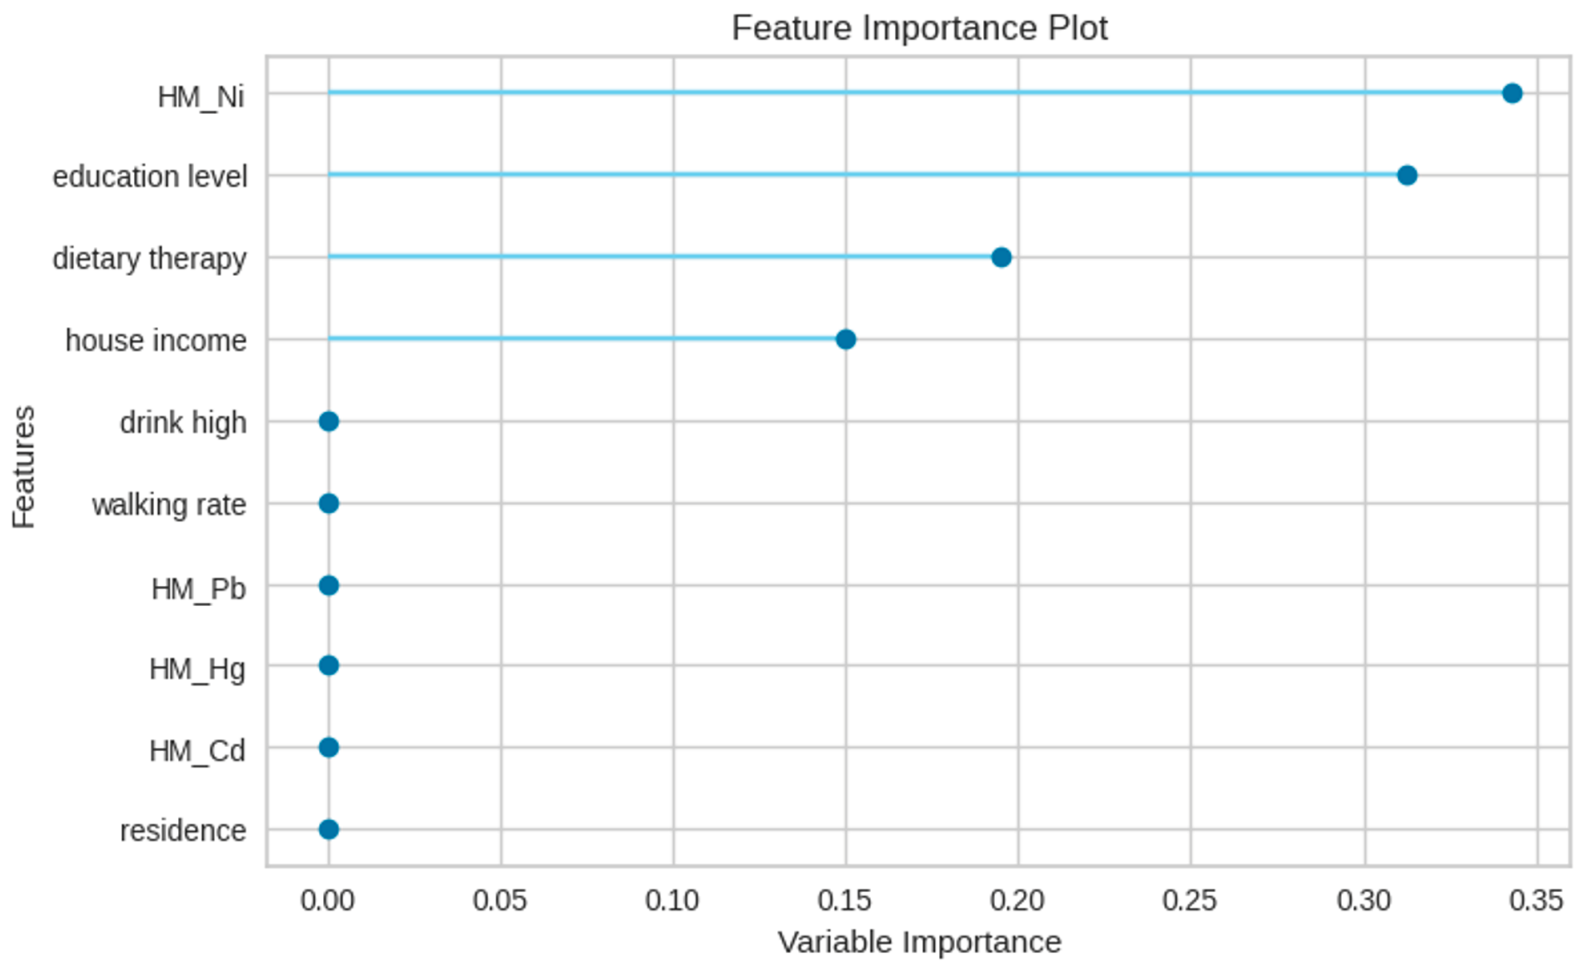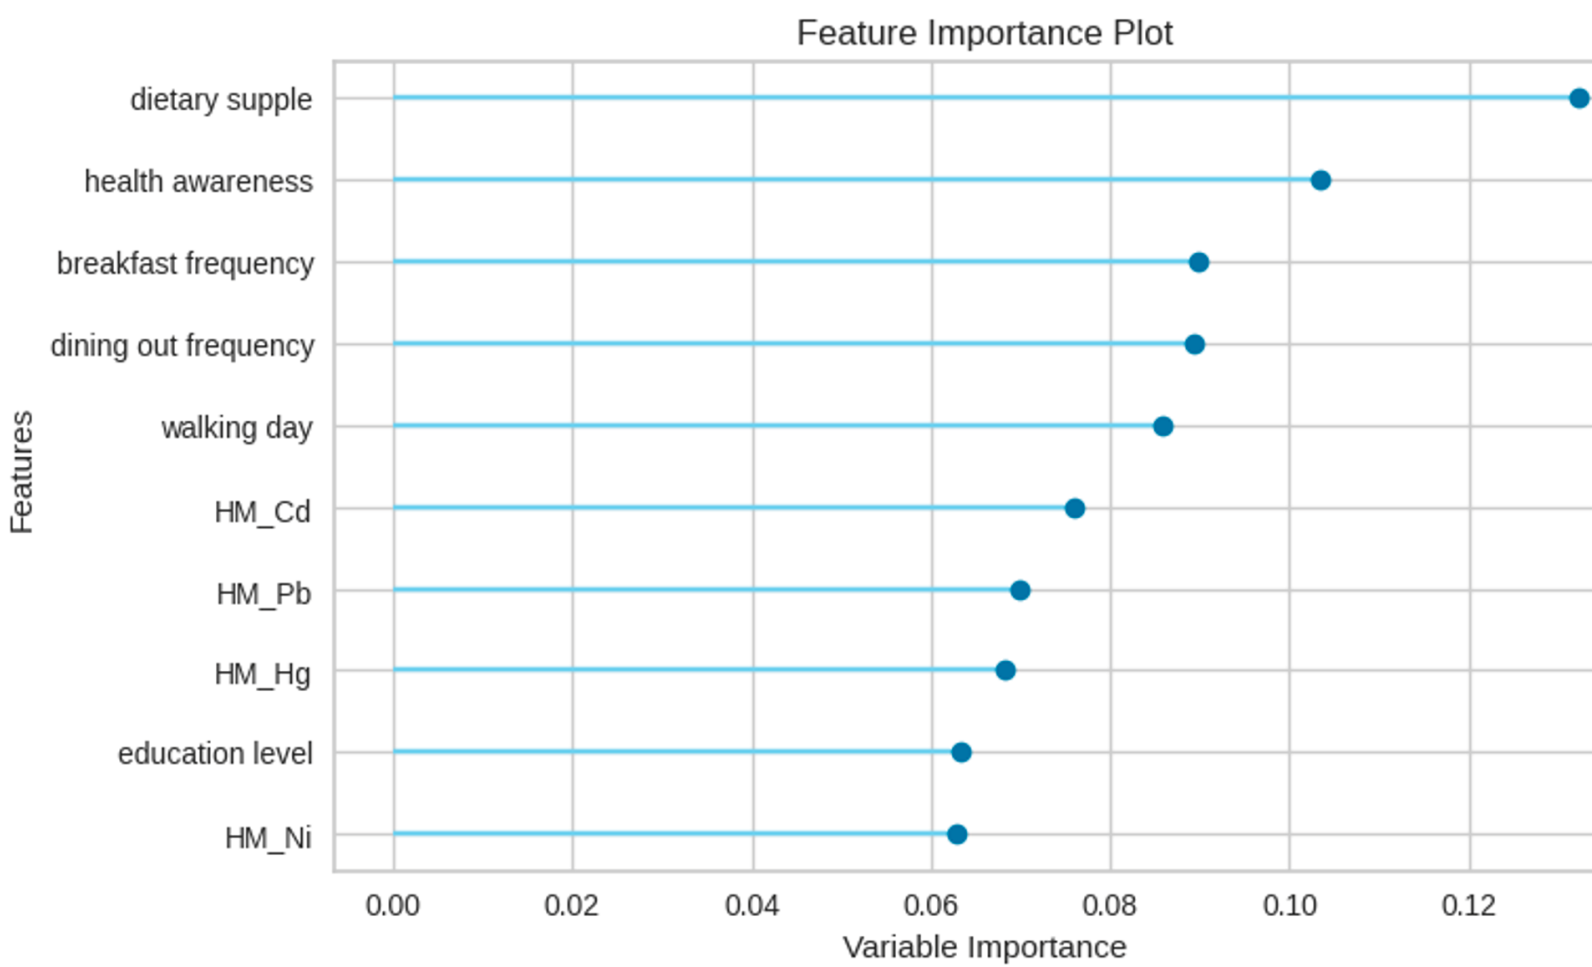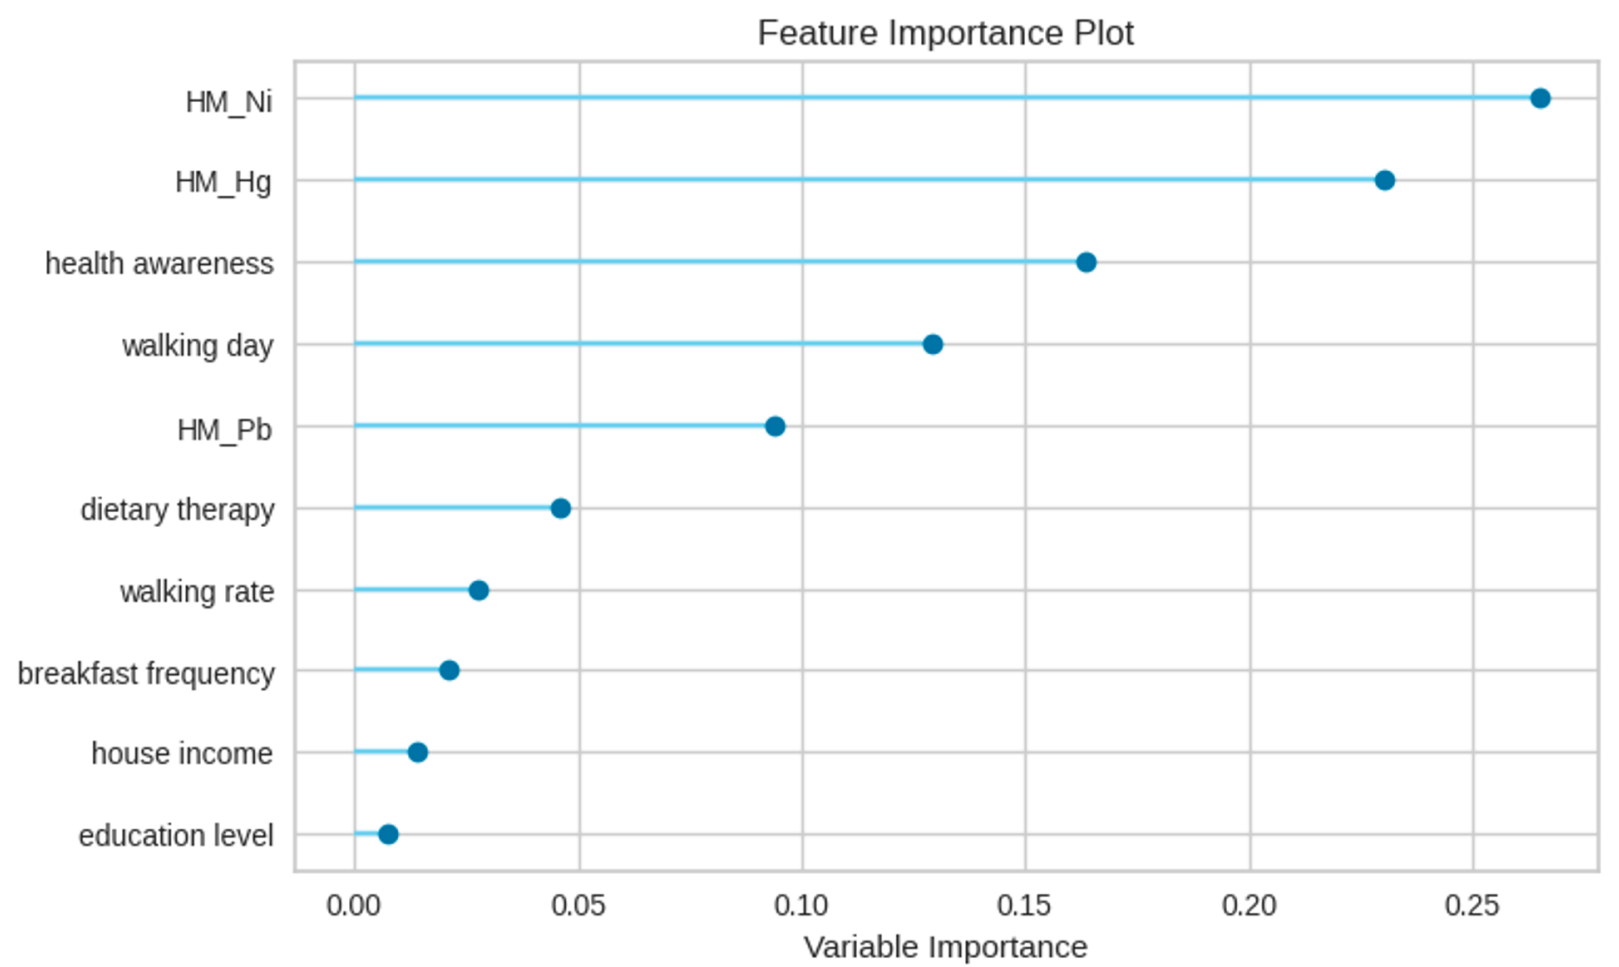

# Supplementary Figure S3

## Cluster 4

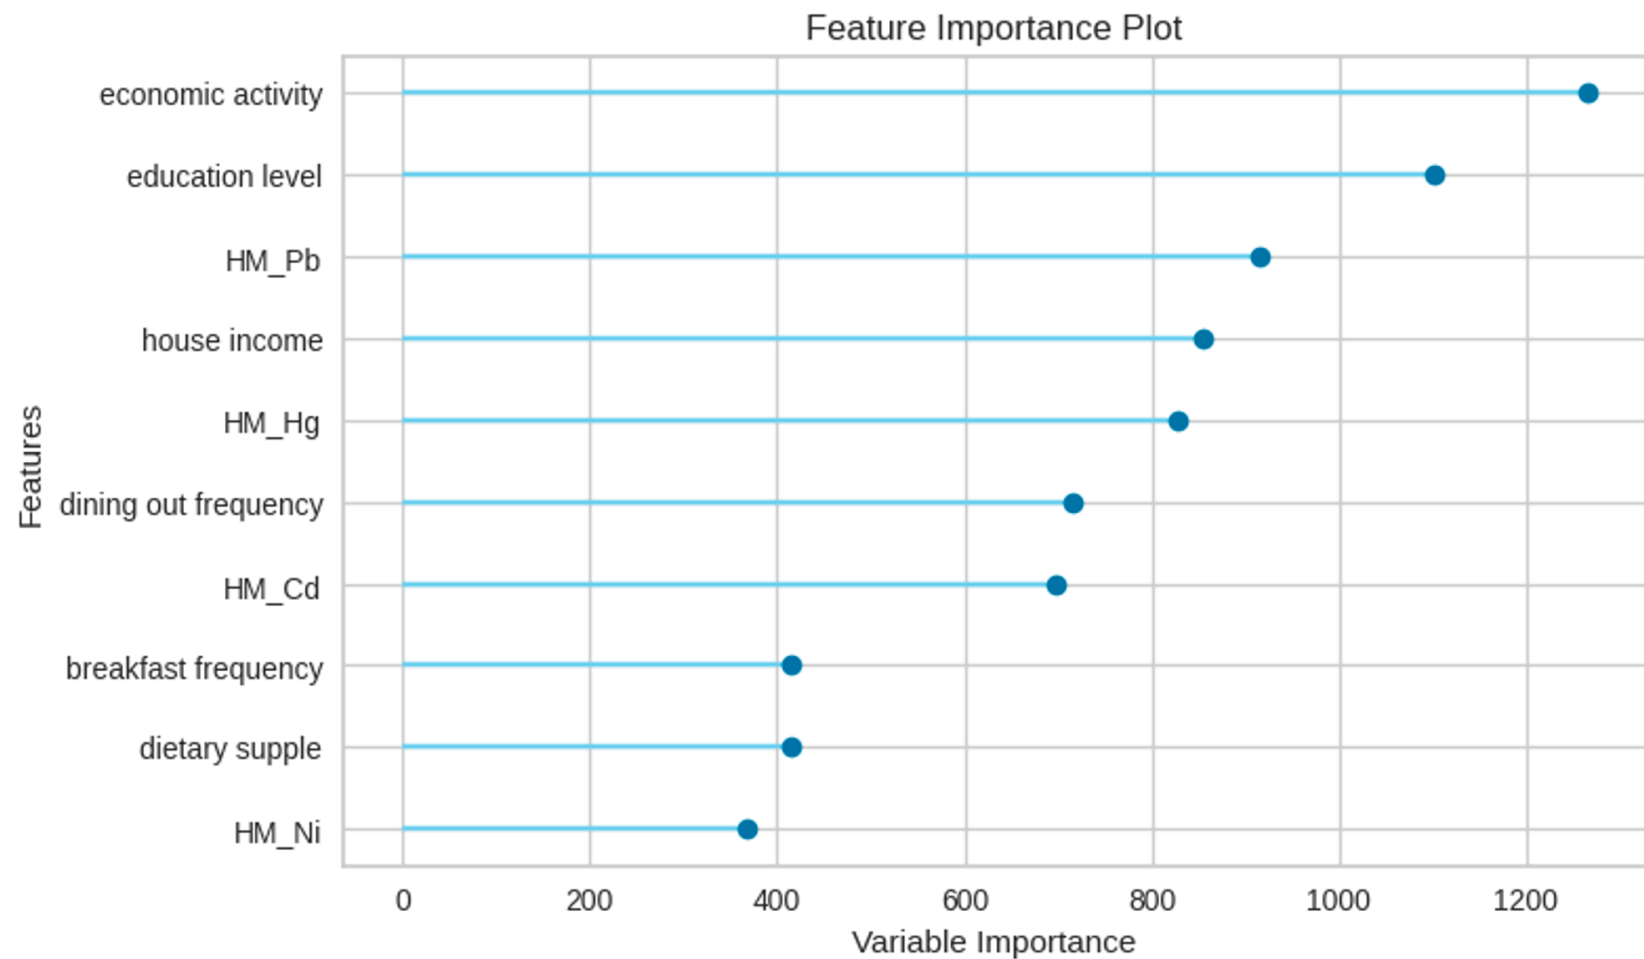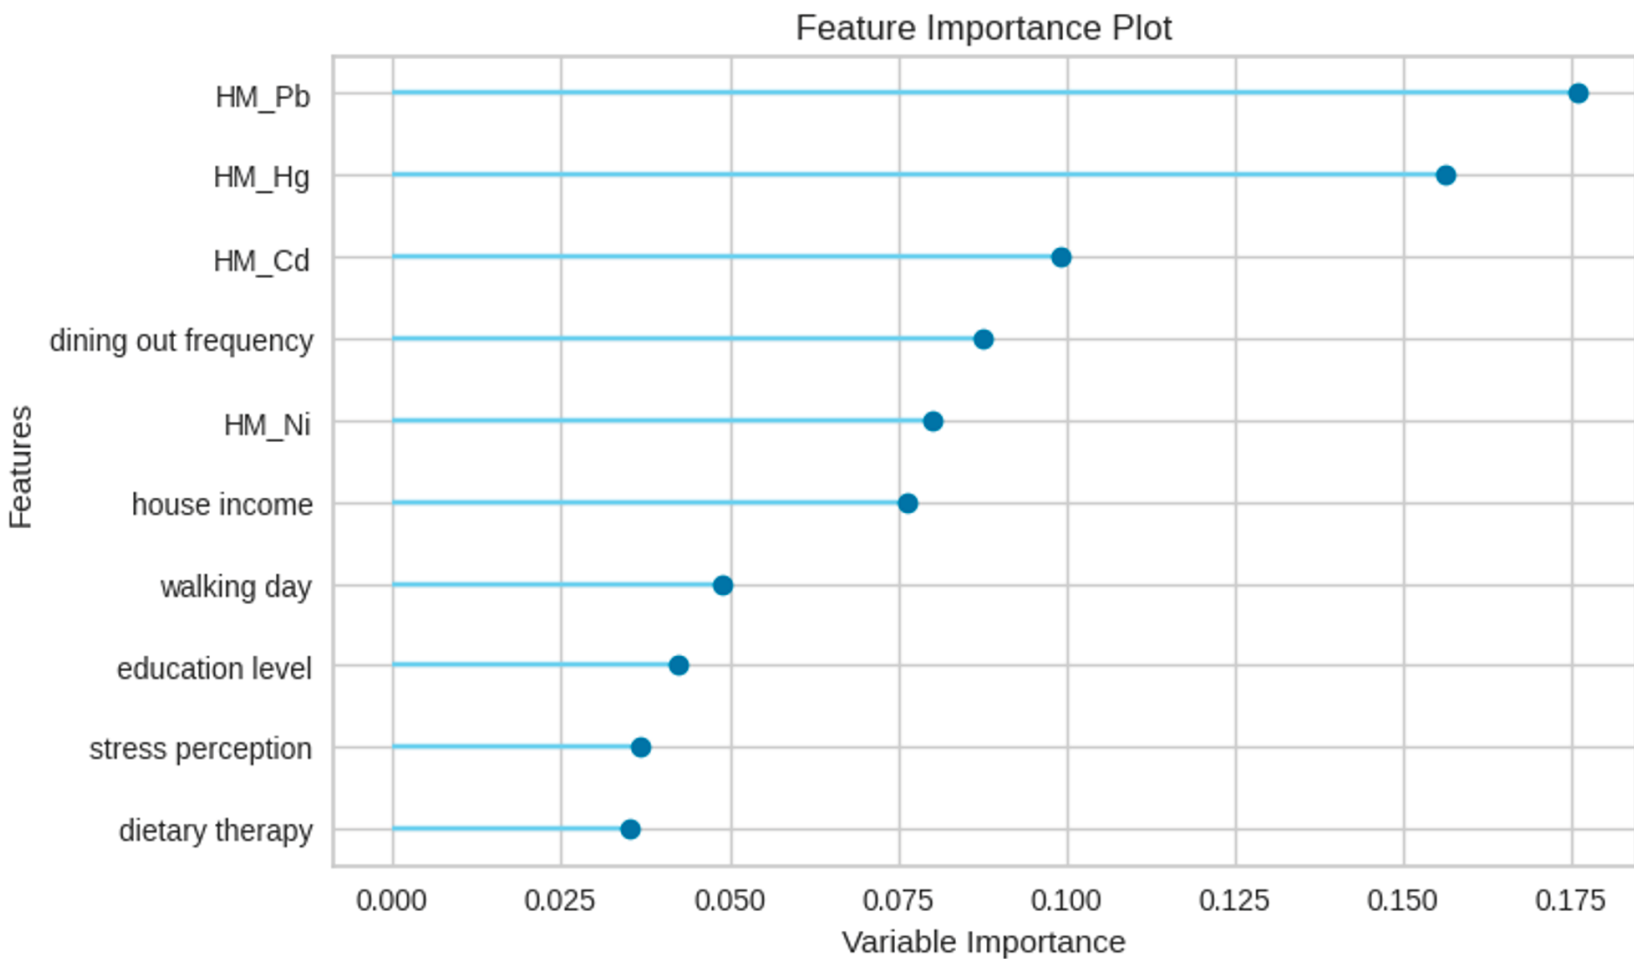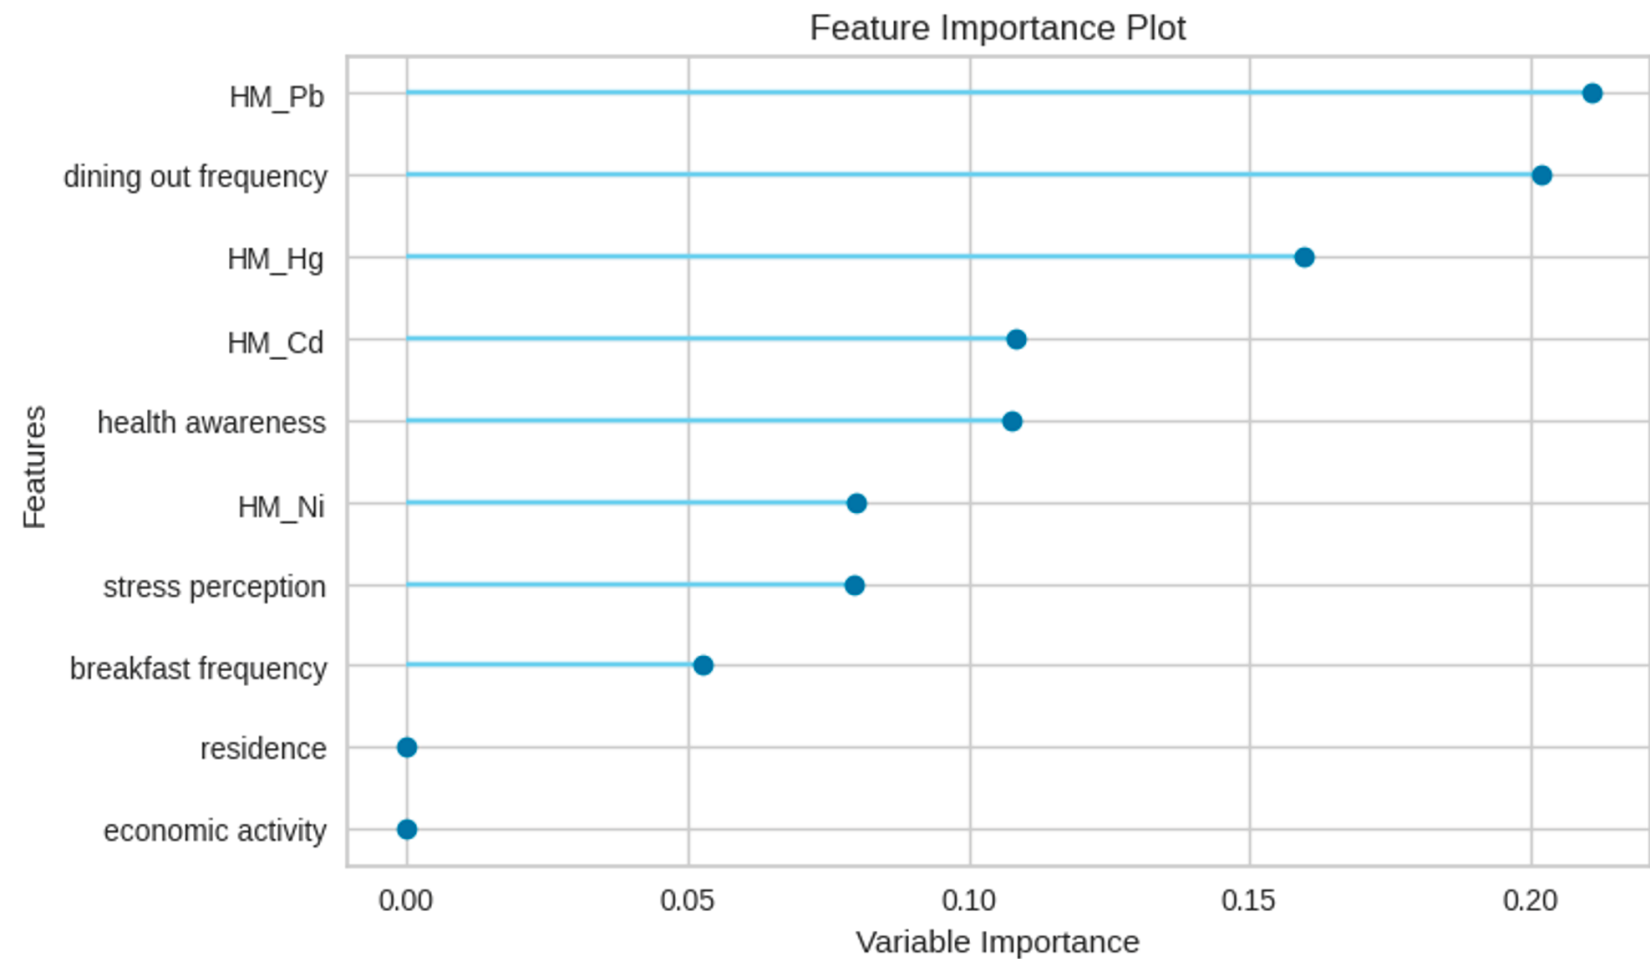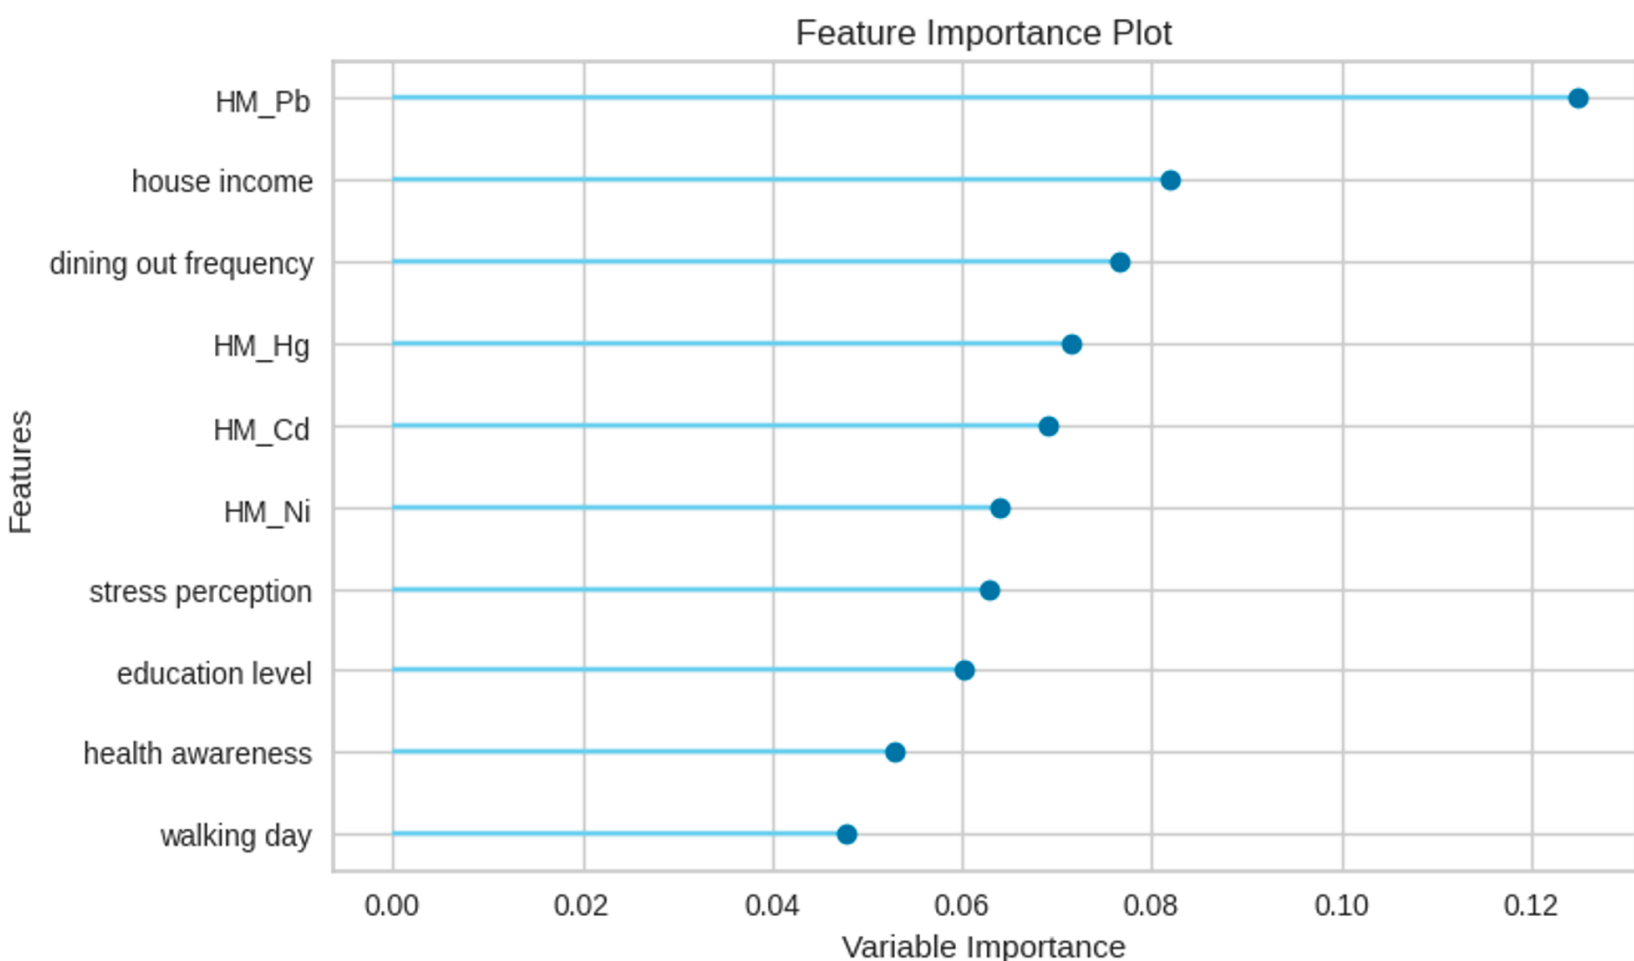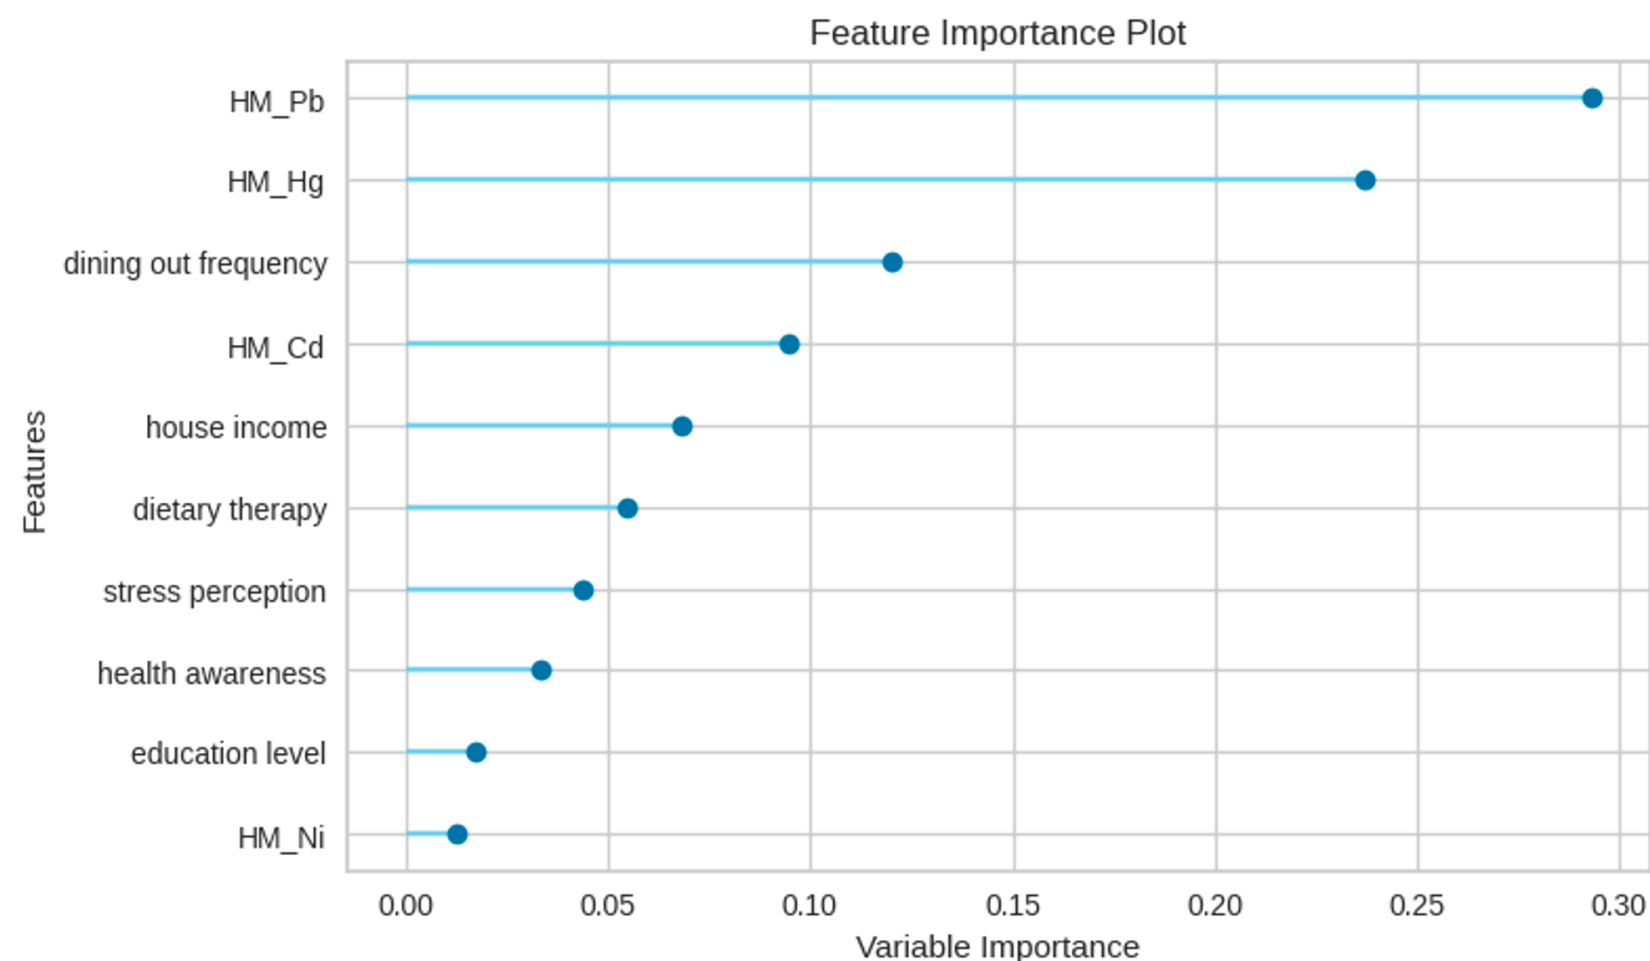

Supplement: s1 [file s1]
